# Supplementary material
Source: ML conference proceedings conference paper supplement (https://openreview.net/forum?id=2ySt3cdGfJ)
Supplement: supplementary_material [file attachment]

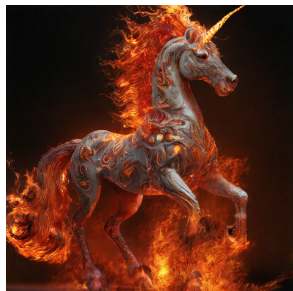

A mesmerizing (Unicorn-Horse) crafted from swirling fire and lava.

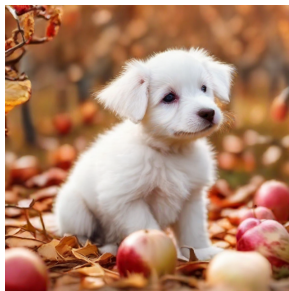

one cute little white puppy is sitting in an apple orchard in autumn

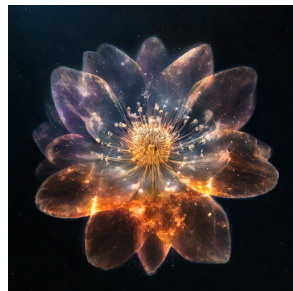

A space flower, transparent, with a Universe within.

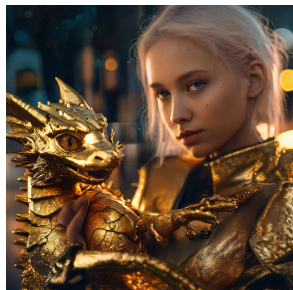

Blonde headed cyberpunk girl holding her golden baby dragon.

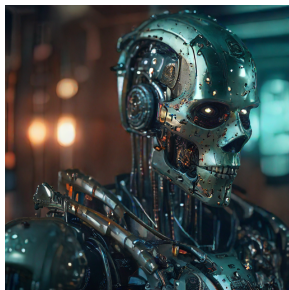

Portrait photo of a war man cyborg robot in a chemical laboratory + face.

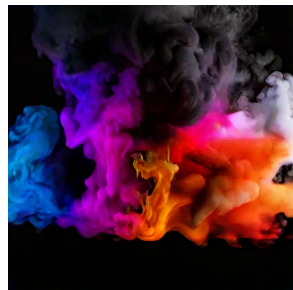

Black background with smoke in spotlight.

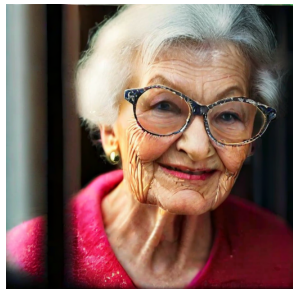

A stylishly dressed elderly woman face with big glass.

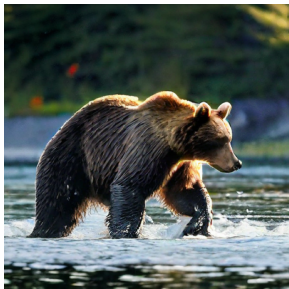

A bear playing in the water, next to the shore.

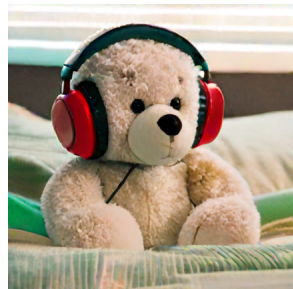

A dog laying on its stomach on a skateboard.
