# Supplementary material
Source: ML conference proceedings conference paper supplement (https://openreview.net/forum?id=2ySt3cdGfJ)
Supplement: supplementary_material [file attachment]

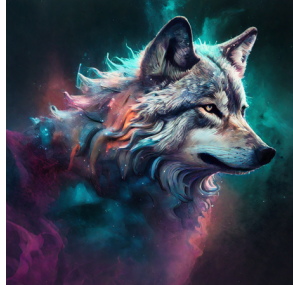

Wolf in space nebula.

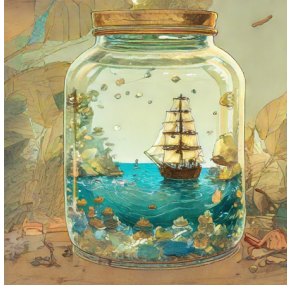

An ocean made of liquid gold, set in a glass bottle, a pirate sailing on a leaf.

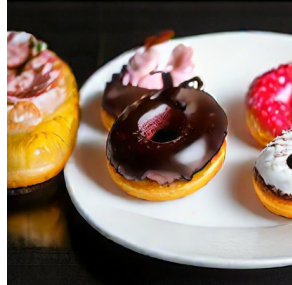

Donuts and assorted pastries fill this white plate.

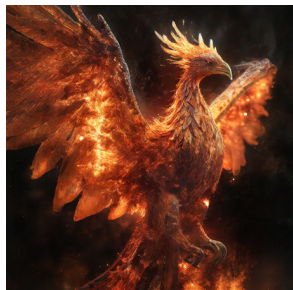

Phoenix emerging from fire with galaxy.

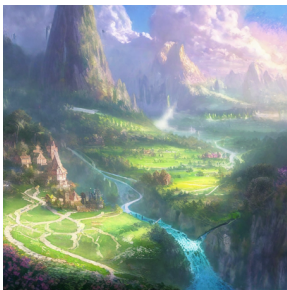

Magical world, valley.

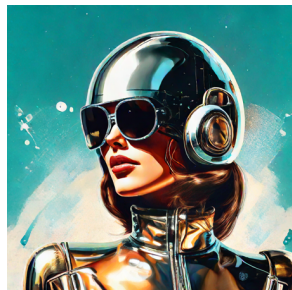

A quantic vintage Futurist, Space rocket air hostess.

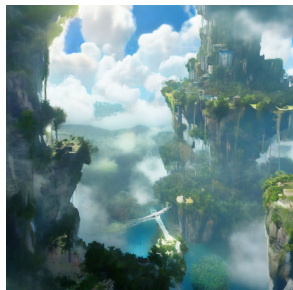

A floating island level suspended in the clouds.

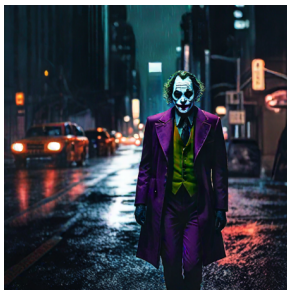

The joker walking through streets of New York.

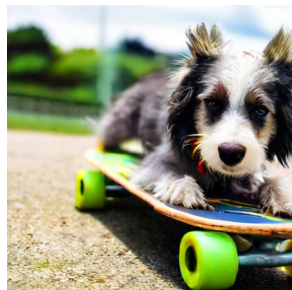

A dog laying on its stomach on a skateboard.
